# Supplementary material for: The Human Brainnetome Atlas: A New Brain Atlas Based on Connectional Architecture
Source: PubMed Central journal article supplement — Cereb Cortex. 2016 Jul 25;26(8):3508–26. doi: 10.1093/cercor/bhw157 (PMC4961028; doi:10.1093/cercor/bhw157), 2016-07-25
Supplement: supp_bhw157_bhw157supp.pdf [file supp_bhw157_bhw157supp.pdf]

## 1 **Supplementary Methods**

### 2 *MRI Acquisitions*

3 The main scanning parameters are summarized below. Parameters for the dMRI scan were as follows:  
4 TR = 5520 ms, TE = 89.5 ms, FA = 78 °, 1.25 × 1.25 × 1.25 mm voxels, FOV = 210×180 mm, and the  
5 full dMRI session included 6 runs, representing 3 different gradient tables, with each table acquired  
6 once with right-to-left and left-to-right phase encoding polarities. Each gradient table included  
7 approximately 90 diffusion weighted directions plus 6 b = 0 acquisitions interspersed throughout each  
8 run. Diffusion weighting consisted of 3 shells of b = 1000, 2000, and 3000 s/mm<sup>2</sup> interspersed with an  
9 approximately equal number of acquisitions on each shell within each run. Resting-state fMRI  
10 consisted of gradient-echo echo planar imaging (EPI) sensitive to blood oxygenation level dependent  
11 (BOLD) contrast. Parameters for the rfMRI data were: TR = 720 ms, TE = 33.1 ms, FA = 52 °, 2 × 2 ×  
12 2 mm voxels, FOV = 208 × 180 mm, and 72 oblique axial slices that alternated between phase  
13 encoding in a right to left direction in one run and phase encoding in a left to right direction in the  
14 other run. Each functional run lasted 14.55 min (1200 time points). The structural T1-weighted  
15 images were collected with a 3D magnetization-prepared rapid acquisition with gradient echo  
16 (MPRAGE) sequence (sagittal plane; TR = 2400 ms; TE = 2.14 ms; TI = 1000 ms; iPAT = 2; 0.7 mm  
17 isotropic voxels, 256 interleaved slices; FOV = 224 mm; flip angle = 8 °; time = 7:40 min).  
18 T2-weighted images were collected with a T2 sampling perfection with application optimized  
19 contrasts (SPACE) sequence using different flip angle evolutions (TR = 3200; TE = 565 ms; iPAT = 2;  
20 0.7 mm isotropic voxels, 256 interleaved slices; FOV = 224 mm; variable flip angle; time = 8:24  
21 min)..

### 22 *Data Preprocessing*

23 The HCP MRI data preprocessing pipelines are primarily built using tools from the FMRIB Software  
24 Library (FSL) and FreeSurfer software (<http://surfer.nmr.mgh.harvard.edu>). We have summarized the

1 main steps of the data preprocessing pipeline below.

2       **Structural MRI:** The structural images first went through the HCP *PreFreeSurfer* pipeline  
3 which performed gradient distortion correction, alignment, averaging of the two sets of T1- and  
4 T2-weighted scans, brain extraction, readout distortion correction, and bias field correction, followed  
5 by registration to Montreal Neurological Institute (MNI) space. Next, the grey matter was parcellated  
6 into 34 cortical regions of interest (ROIs) per hemisphere and 14 subcortical ROIs based on the  
7 Desikan-Killiany (DK) atlas. Finally, the processed cortical and subcortical volumetric results in  
8 individual space were wrapped into standard MNI space.

9       **Diffusion MRI:** The HCP diffusion images were processed by the HCP *Diffusion*  
10 *Preprocessing* pipeline using the FMRIB diffusion toolbox (FSL 5.0; <http://www.fmrib.ox.ac.uk/fsl>).  
11 Images were corrected for motion and eddy current distortions. After intensity normalization, the b0  
12 images of both phase-encoding directions (i.e., left-to-right and right-to-left) were used to calculate  
13 EPI susceptibility-induced field distortions, which were modeled using the eddy tool of FSL, and then  
14 corrected.

15       **Resting-state fMRI:** During the resting-state scan, the subjects underwent two runs of passive  
16 fixation (FIX) in each of two separate sessions. In each session, the phase encoding was in a right to  
17 left direction in one run and in a left to right direction in the other run. In this study, we chose the data  
18 from session 1 with the left to right phase encoding. These time series data were preprocessed using  
19 tools from FSL and FreeSurfer to implement gradient unwarping, motion correction, fieldmap-based  
20 EPI distortion correction, brain-boundary-based registration of EPI to a structural T1-weighted scan,  
21 non-linear registration into MNI space, and grand-mean intensity normalization. Following  
22 FIX-denoising, we then further processed rfMRI data using FSL and the Analysis of Functional  
23 NeuroImages (AFNI) by (1) band-pass filtering of the time-series ( $0.01 \text{ Hz} < f < 0.1 \text{ Hz}$ ); (2)  
24 regressing the nuisance signals including the (rigid) head rigid motion parameters, white matter mean  
25 signal, cerebrospinal fluid mean signal, and global mean signal; and (3) spatial smoothing the  
26 residuals using a 4 mm full-width at half-maximum (FWHM) Gaussian kernel.

## 1 Supplementary Table

| Initial Seed Masks |                                          | FreeSurfer Desikan-Killiany Atlas                                                                                        |
|--------------------|------------------------------------------|--------------------------------------------------------------------------------------------------------------------------|
| 1                  | SFG, Superior Frontal Gyrus              | Superior Frontal Gyrus                                                                                                   |
| 2                  | MFG, Middle Frontal Gyrus                | Anterior and Posterior part of Middle Frontal Gyrus                                                                      |
| 3                  | IFG, Inferior Frontal Gyrus              | Pars Opercularis, Pars Triangularis                                                                                      |
| 4                  | OrG, Orbital Gyrus                       | Pars Orbitalis, Lateral and Medial Divisions of Orbital Gyrus, Frontal Pole                                              |
| 5                  | PrG, Precentral Gyrus                    | Precentral Gyrus                                                                                                         |
| 6                  | PCL, Paracentral Lobule                  | Paracentral Lobule                                                                                                       |
| 7                  | STG, Superior Temporal Gyrus             | Superior Temporal Gyrus, Temporal Pole, Transverse Temporal Cortex                                                       |
| 8                  | MTG, Middle Temporal Gyrus               | Middle Temporal Gyrus                                                                                                    |
| 9                  | ITG, Inferior Temporal Gyrus             | Inferior Temporal Gyrus                                                                                                  |
| 10                 | FuG, Fusiform Gyrus                      | Fusiform Gyrus                                                                                                           |
| 11                 | PhG, Parahippocampal Gyrus               | Entorhinal Area, Parahippocampal Gyrus                                                                                   |
| 12                 | Psts, Posterior Superior Temporal Sulcus | Banks of the Superior Temporal Sulcus                                                                                    |
| 13                 | SPL, Superior Parietal Lobule            | Superior Parietal Lobule                                                                                                 |
| 14                 | IPL, Inferior Parietal Lobule            | Inferior Parietal Lobule, Supramarginal Gyrus                                                                            |
| 15                 | Pcun, Precuneus                          | Precuneus Cortex                                                                                                         |
| 16                 | PoG, Postcentral Gyrus                   | Postcentral Gyrus                                                                                                        |
| 17                 | INS, Insular Gyrus                       | Insular Cortex                                                                                                           |
| 18                 | CG, Cingulate Gyrus                      | Anterior Cingulate Gyrus, Posterior Cingulate Gyrus, Caudal Part of Anterior Cingulate Gyrus, Isthmus of Cingulate Gyrus |
| 19                 | MVOcC, MedioVentral Occipital Cortex     | Cuneus Cortex, Pericalcarine Cortex, Lingual Gyrus                                                                       |
| 20                 | LOcC, Lateral Occipital Cortex           | Lateral Occipital Gyrus                                                                                                  |
| 21                 | Amyg, Amygdala                           | Amygdala                                                                                                                 |
| 22                 | Hipp, Hippocampus                        | Hippocampus                                                                                                              |
| 23                 | BG, Basal Ganglia                        | Caudate Nucleus, Putamen, Globus Pallidus, Nucleus Accumbens                                                             |
| 24                 | Tha, Thalamus                            | Thalamus                                                                                                                 |

## 2 Table S1. Modified Desikan–Killiany Labeling Protocol for the Definition of Seed Masks

3 After the initial parcellation using FreeSurfer, we created a variant of the DK protocol with 20 cortical  
4 regions and 4 subcortical structures per hemisphere.

## Supplementary Figures and Legends

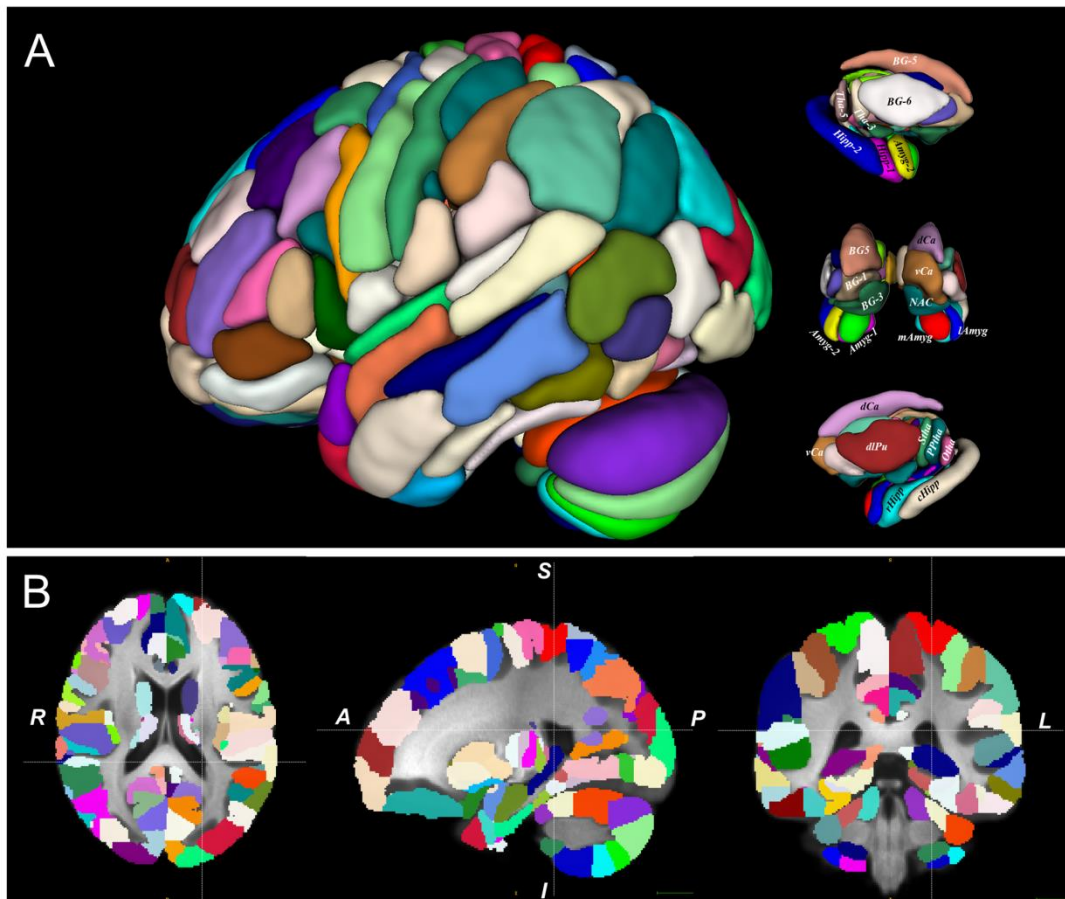

**Figure S1. Brainnetome Atlas Combined with Probabilistic Cerebellar Atlas**

The maximum probability map is visualized using 3D rendering (A) and slice view (B) using ITK-SNAP. A probabilistic cerebellar atlas with 28 anatomical structural subregions (<http://www.icn.ucl.ac.uk/motorcontrol/imaging/suit.htm>) was combined with the Brainnetome Atlas.

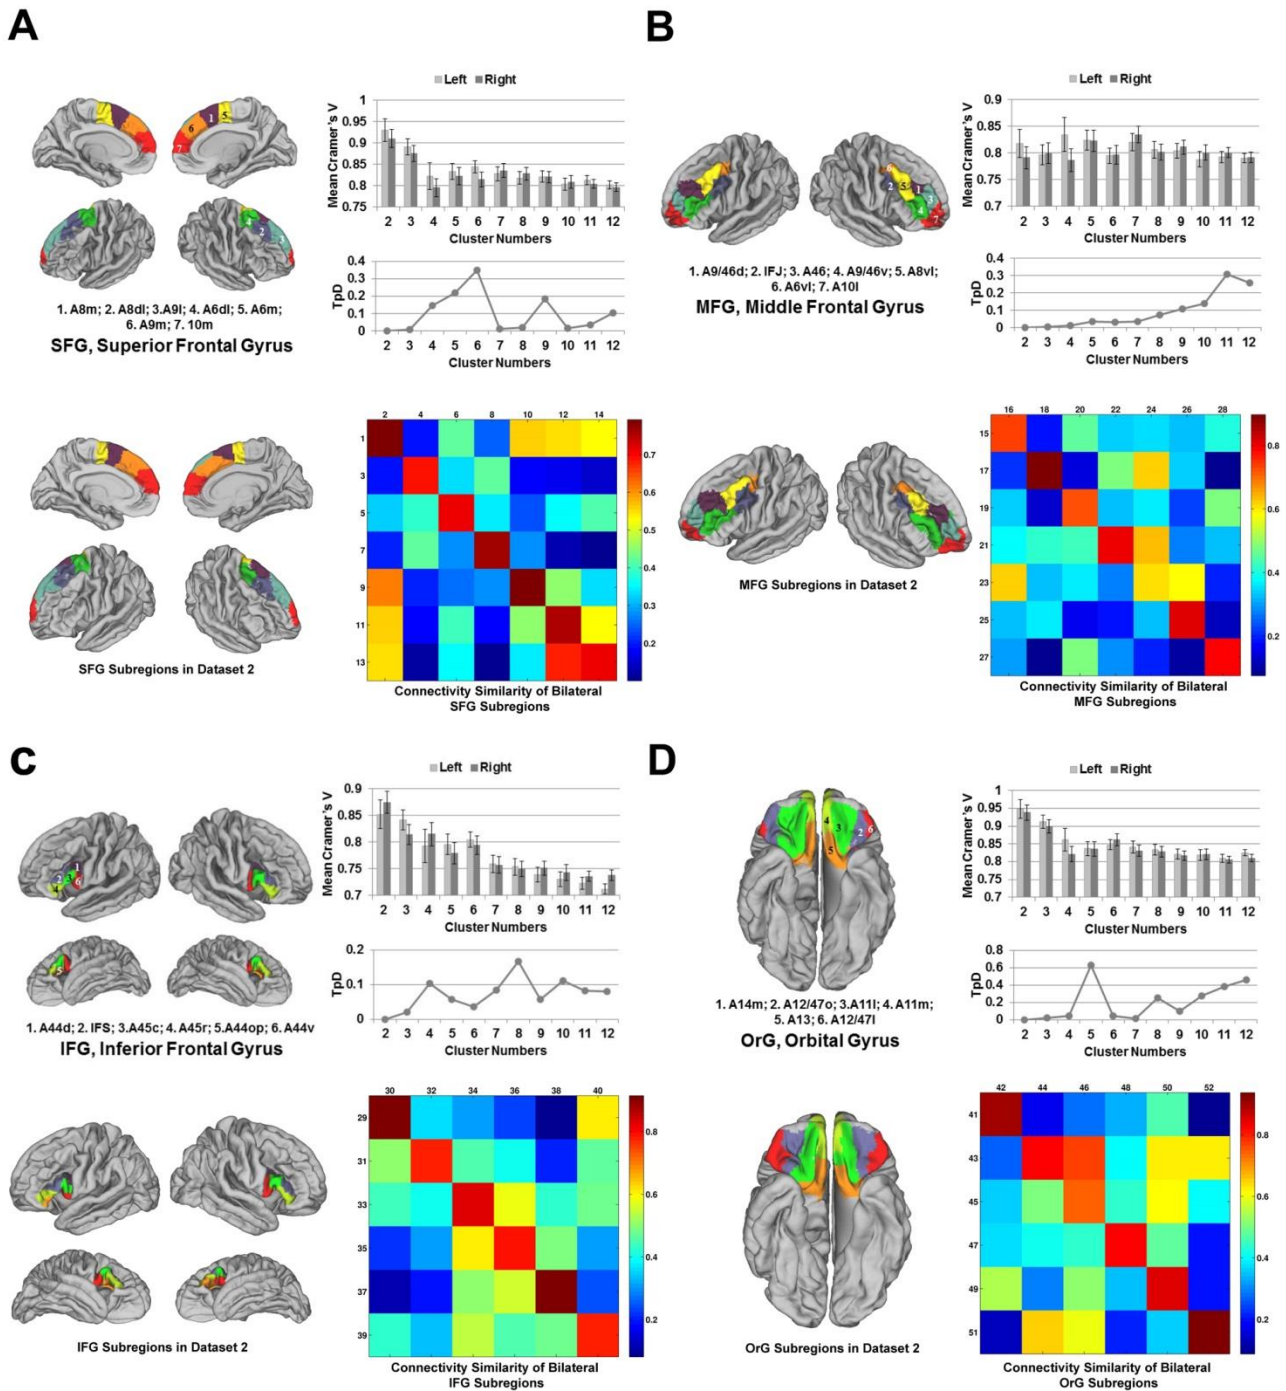

**Figures S2. The Maximum Probability Maps of the Human Brainnetome Atlas Subregions in two Independent Datasets along with the Cramer's V, the Topological Distance (TpD), and the Connectivity Similarity Matrix of Bilateral Subregions: A. SFG, Superior Frontal Gyrus; B. MFG, Middle Frontal Gyrus; C. IFG, Inferior Frontal Gyrus; D. OrG, Orbital Gyrus.**

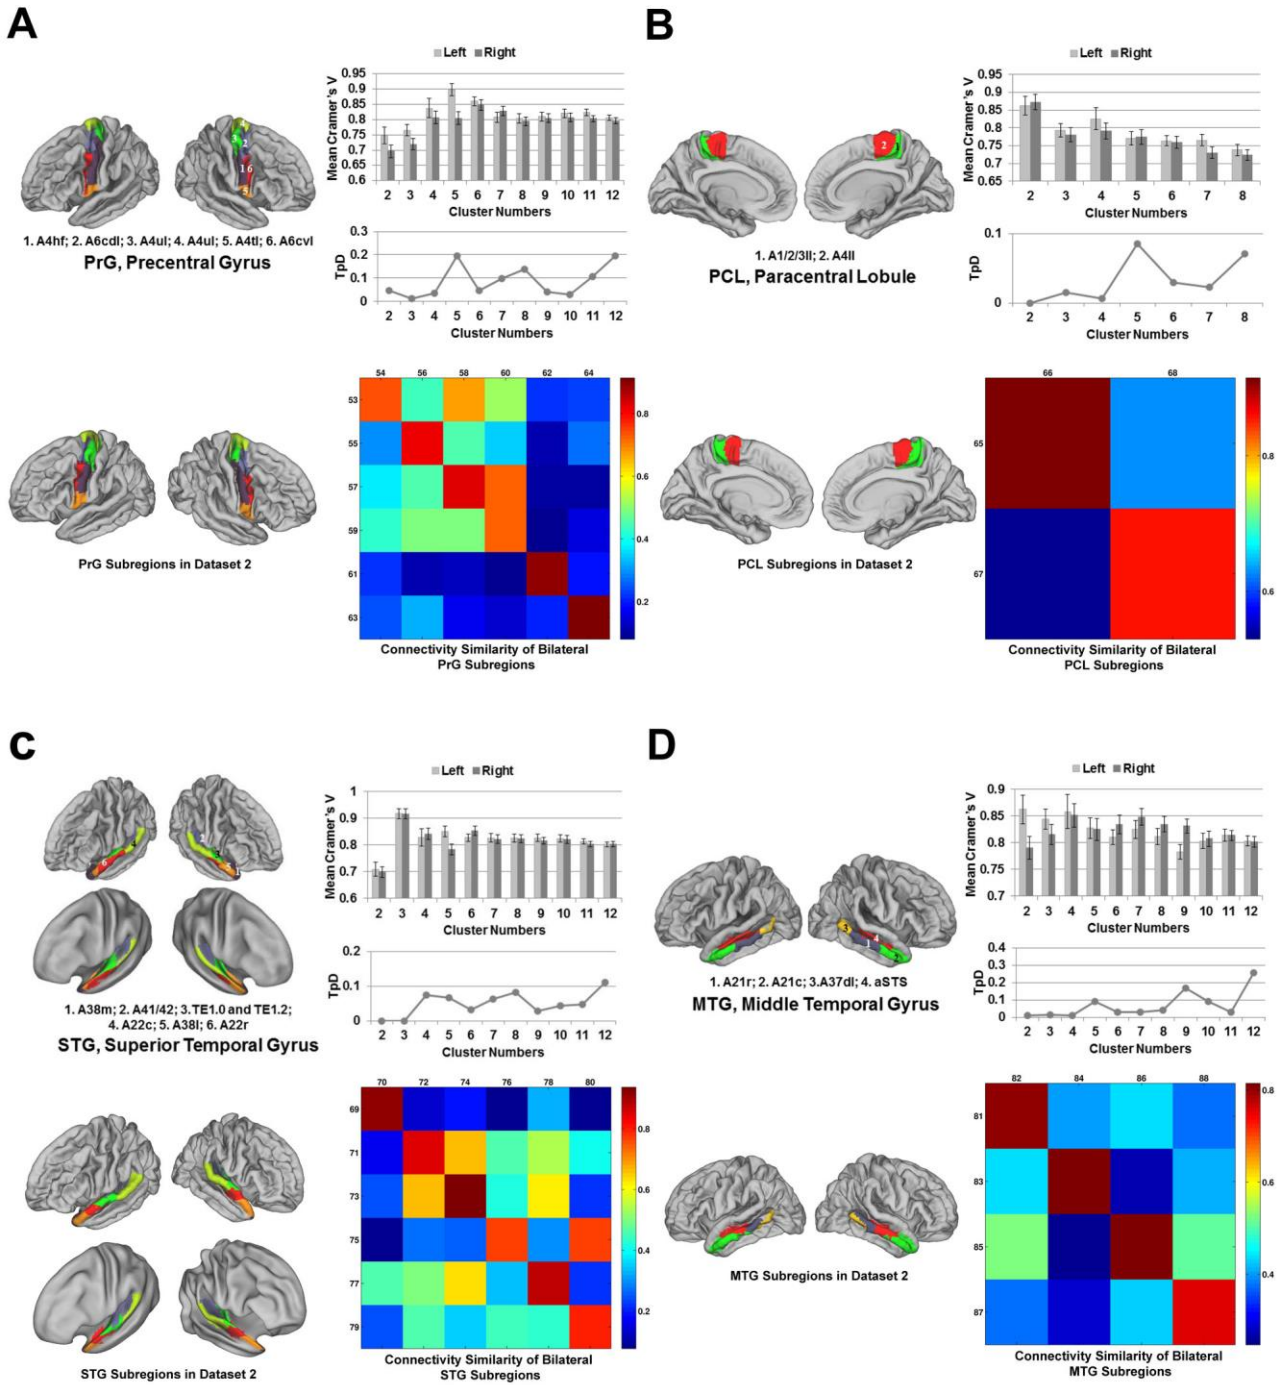

**Figures S3. The Maximum Probability Maps of the Human Brainnetome Atlas Subregions in two Independent Datasets along with the Cramer's V, the Topological Distance (TpD), and the Connectivity Similarity Matrix of Bilateral Subregions: A. PrG, Precentral Gyrus; B. PCL, Paracentral Lobule; C. STG, Superior Temporal Gyrus; D. MTG, Middle Temporal Gyrus.**

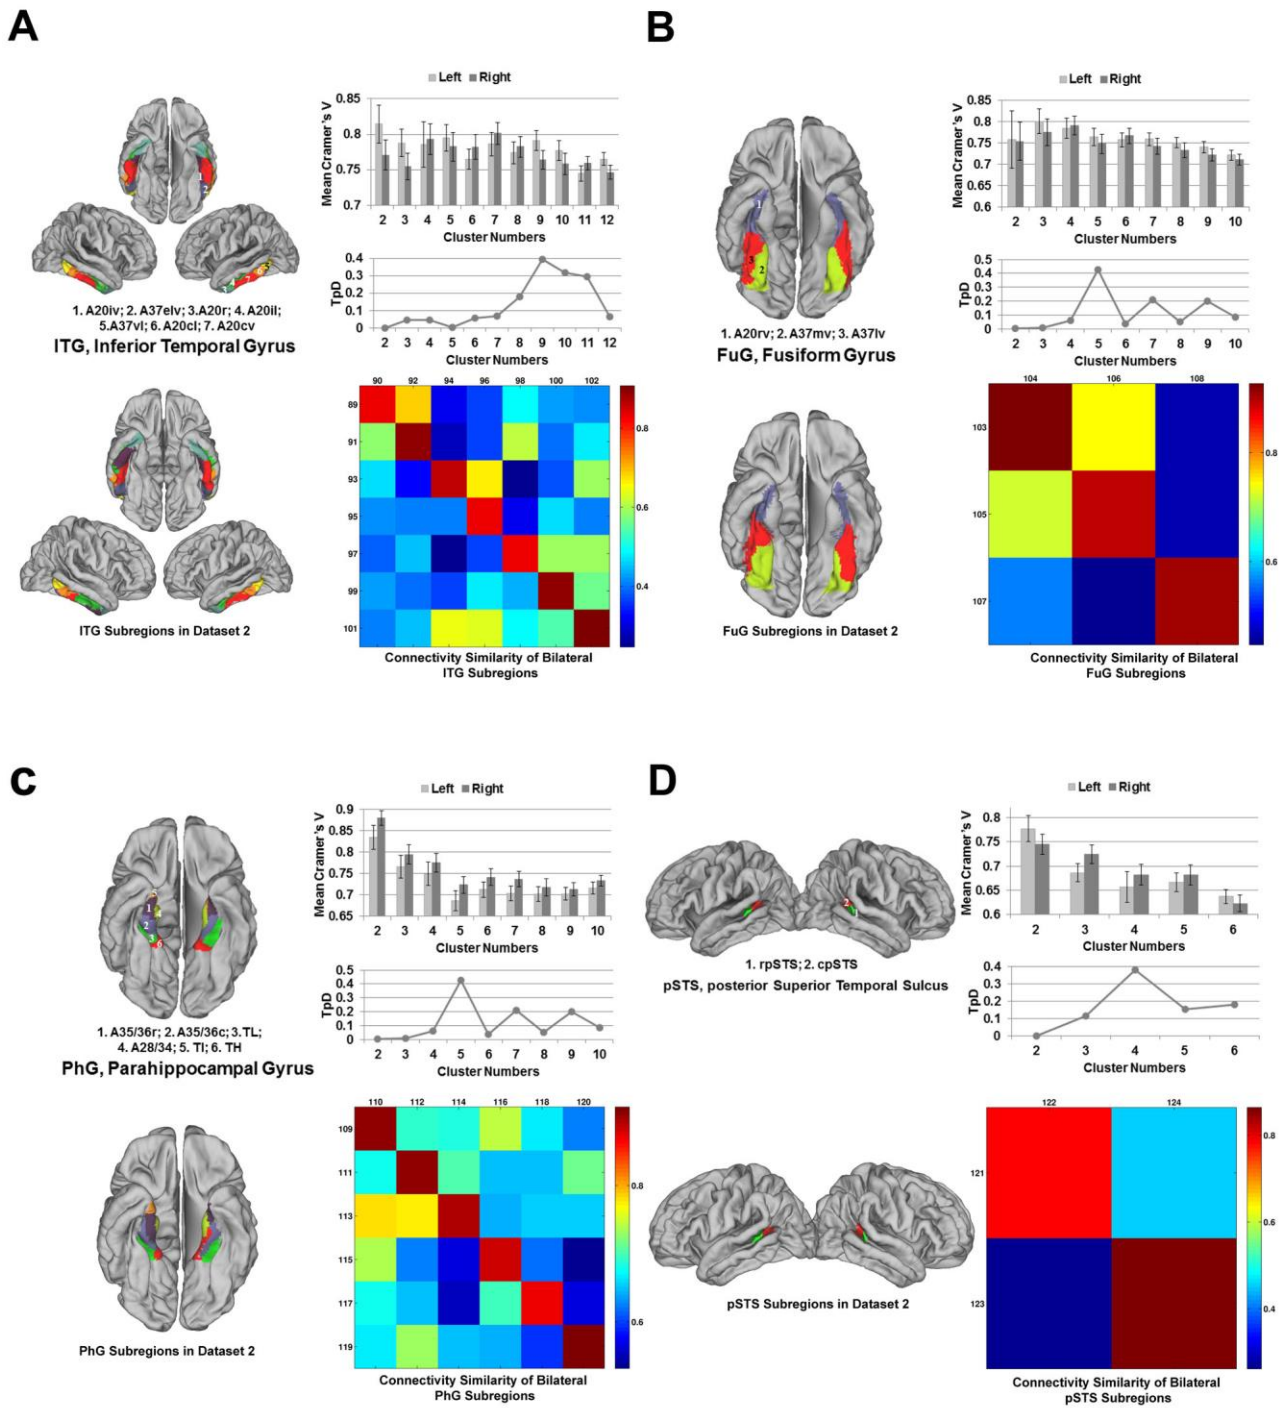

**Figures S4. The Maximum Probability Maps of the Human Brainnetome Atlas Subregions in two Independent Datasets along with the Cramer's V, the Topological Distance (TpD), and the Connectivity Similarity Matrix of Bilateral Subregions: A. ITG, Inferior Temporal Gyrus; B. FuG, Fusiform Gyrus; C. PhG, Parahippocampal Gyrus; D. pSTS, posterior Superior Temporal Sulcus.**

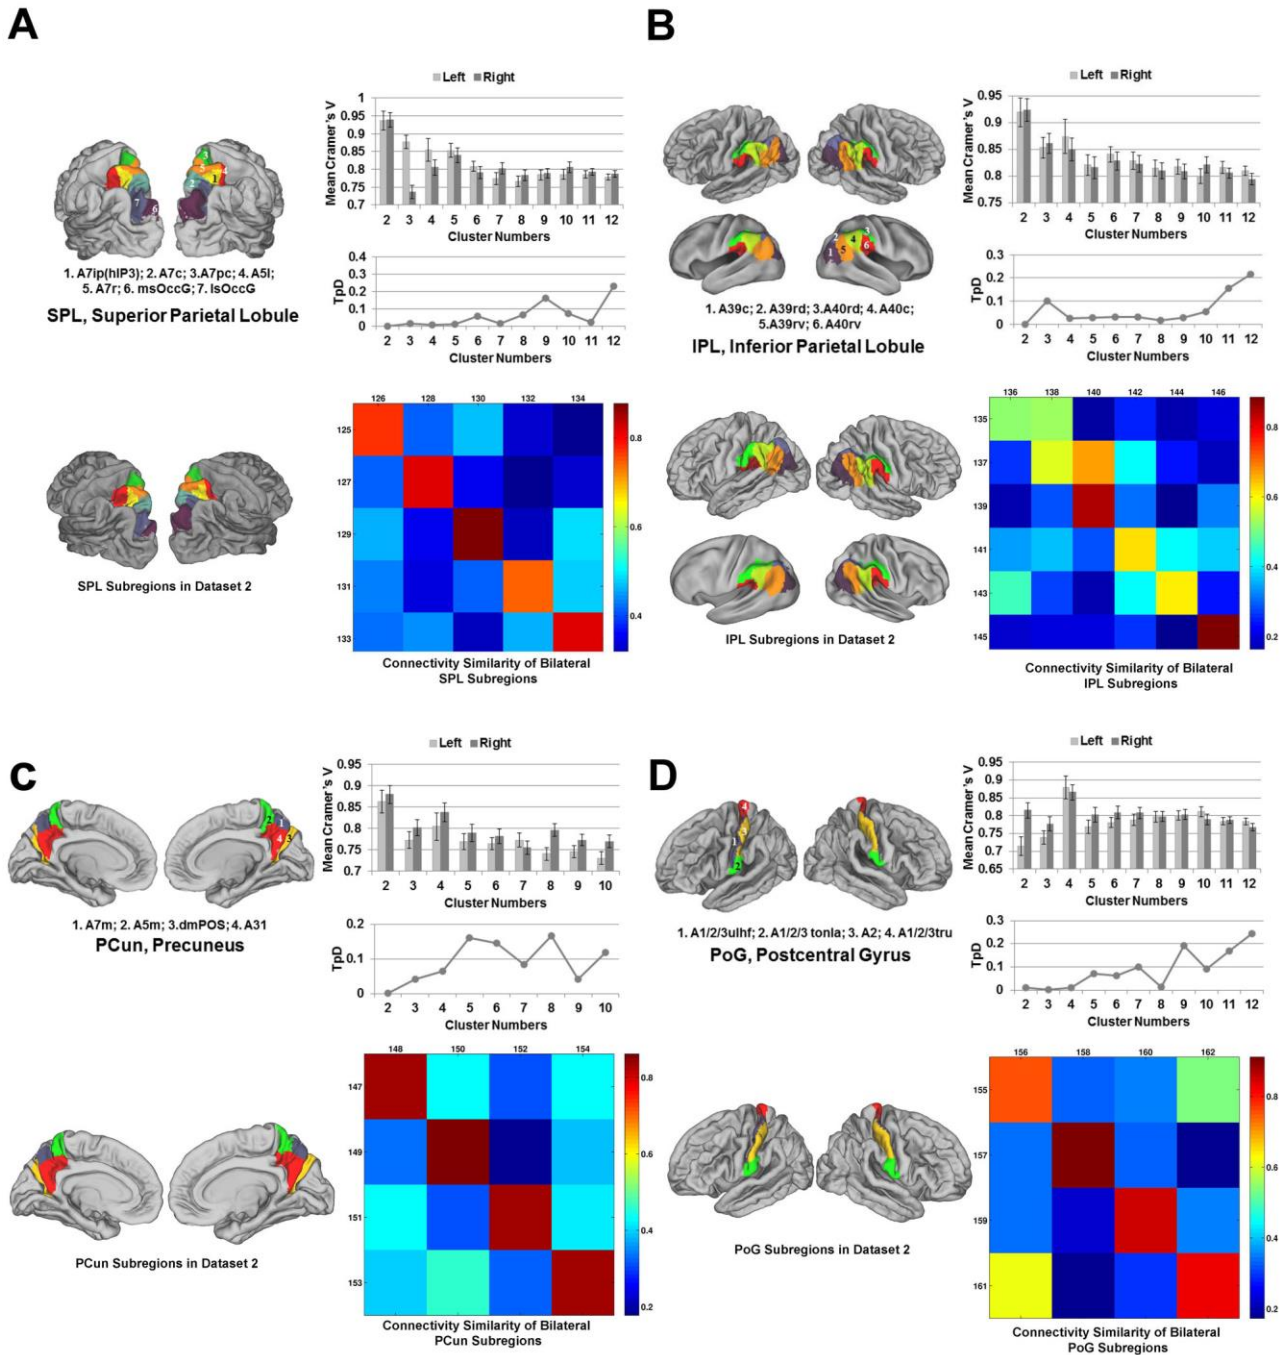

**Figures S5. The Maximum Probability Maps of the Human Brainnetome Atlas Subregions in two Independent Datasets along with the Cramer's V, the Topological Distance (TpD), and the Connectivity Similarity Matrix of Bilateral Subregions:**  
 A. SPL, Superior Parietal Lobule; B. IPL, Inferior Parietal Lobule; C. PCun, Precuneus; D. PoG, Postcentral Gyrus;



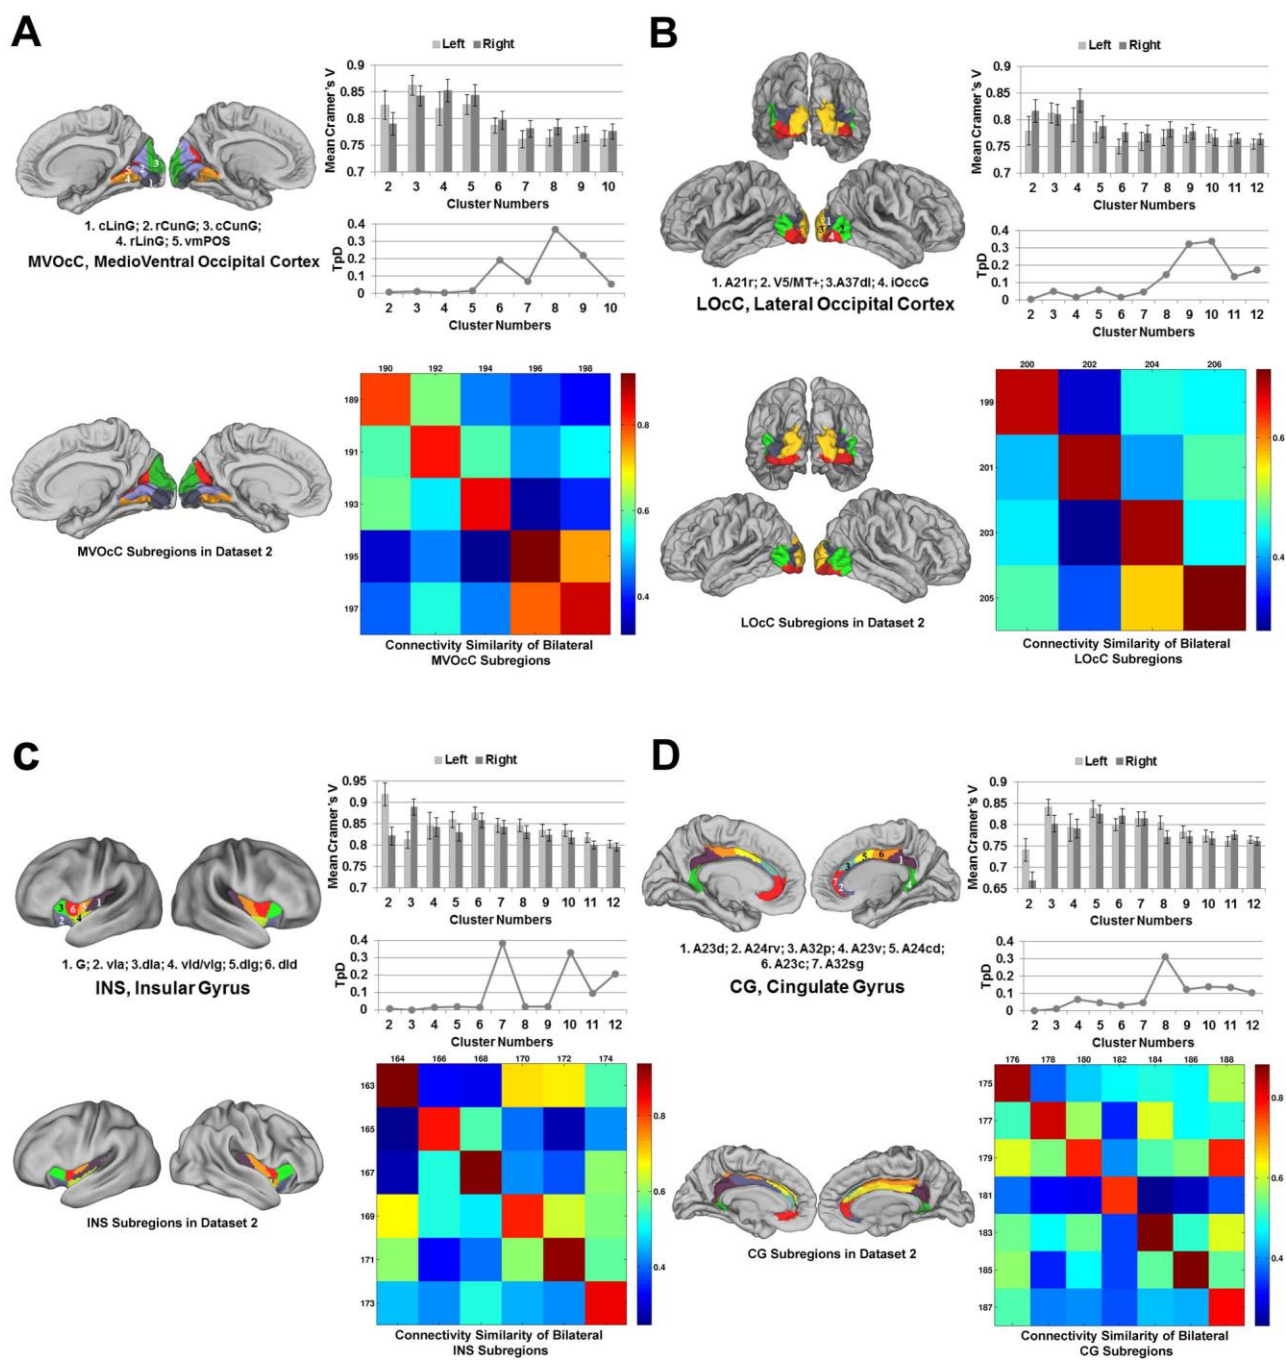

**Figures S6. The Maximum Probability Maps of the Human Brainnetome Atlas Subregions in two Independent Datasets along with the Cramer's V, the Topological Distance (TpD), and the Connectivity Similarity Matrix of Bilateral Subregions: A. MVOcC, MedioVentral Occipital Cortex; B. LOcC, Lateral Occipital Cortex; C. INS, Insular Gyrus; D. CG, Cingulate Gyrus.**

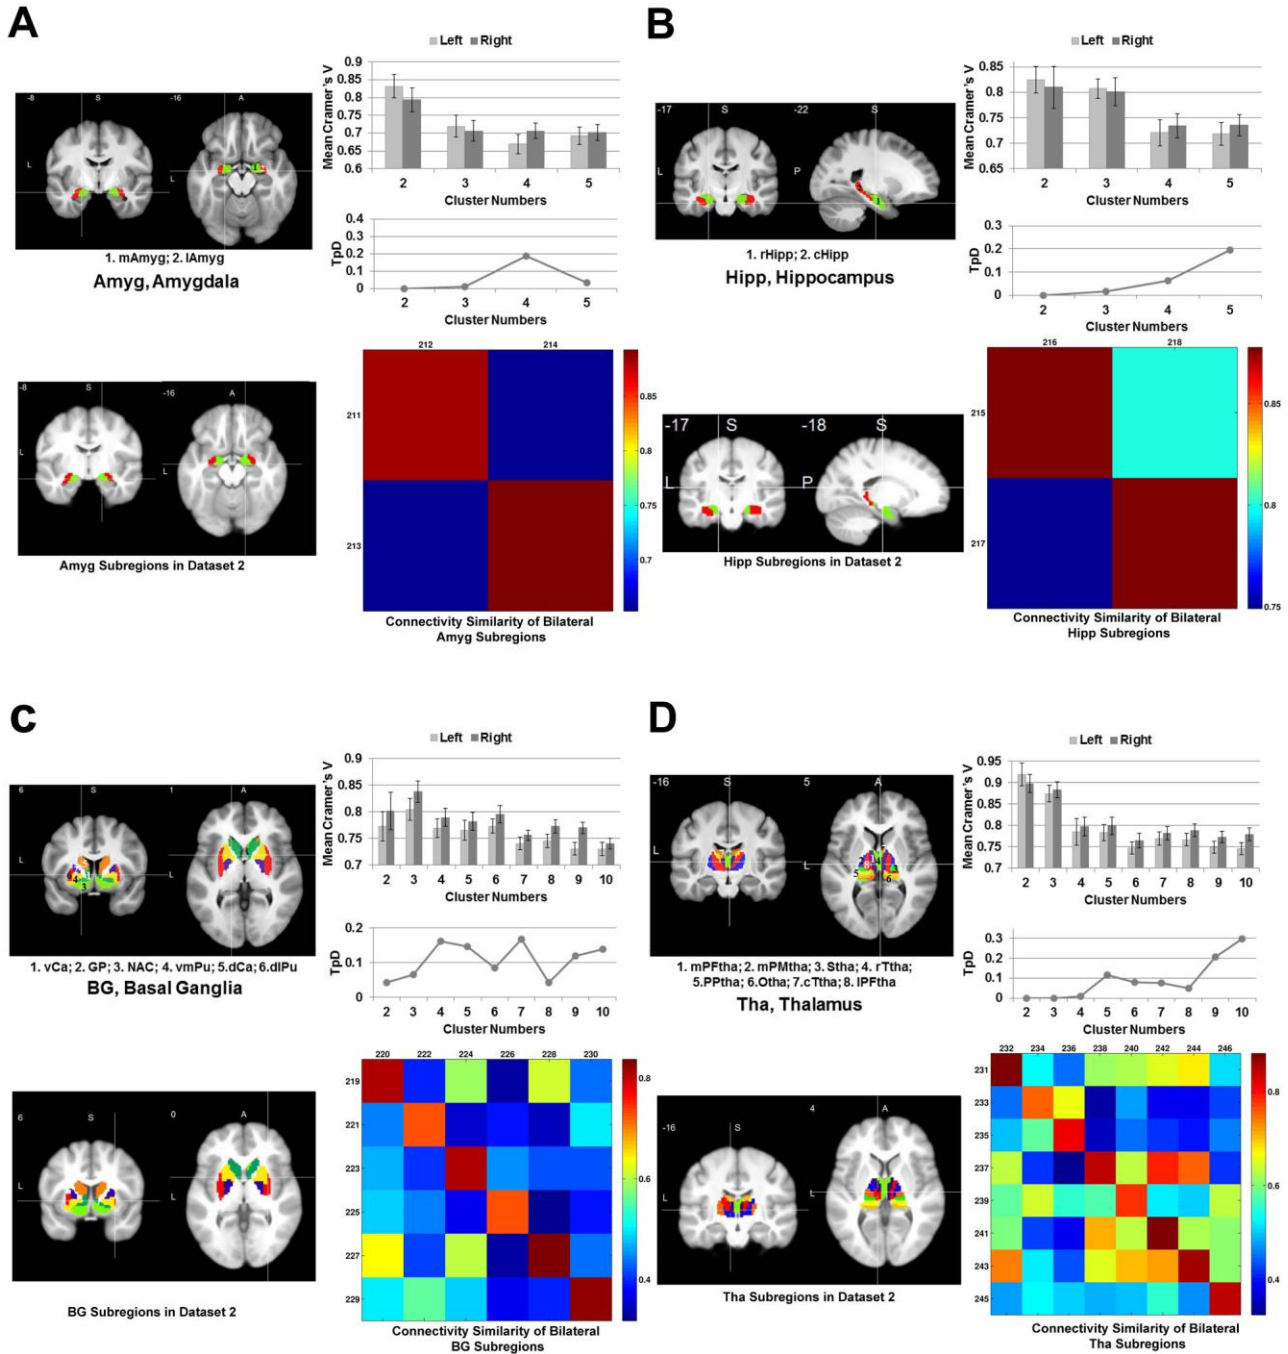

**Figures S7. The Maximum Probability Maps of the Human Brainnetome Atlas Subregions in two Independent Datasets along with the Cramer's V, the Topological Distance (TpD), and the Connectivity Similarity Matrix of Bilateral Subregions: A. Amyg, Amygdala; B. Hipp, Hippocampus; C. BG, Basal Ganglia; D. Tha, Thalamus.**
